# Supplementary material
Source: publisher site journal article supplement (https://www.dovepress.com/article/413532)
Supplement: Supplementary file 1 [file get_supplementary_file.php]

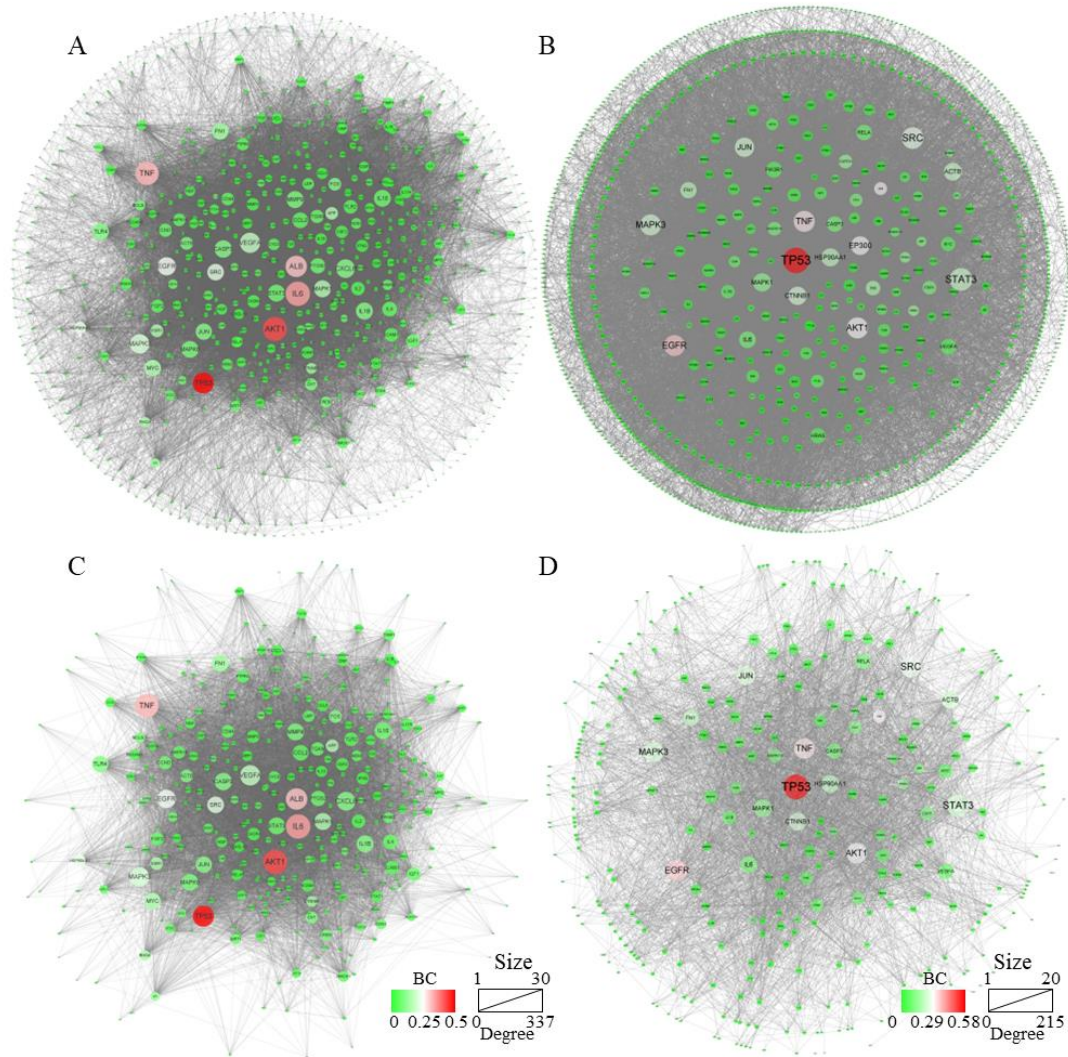

**Figure. S1** COPD and osteoporosis disease-specific protein interaction network. (A) COPD disease-specific protein interaction network; (B) Osteoporosis disease-specific protein interaction network; (C) The relative positions of 340 common targets in the PPI network of COPD; (D) The relative position of 340 common targets in the PPI network of osteoporosis. The node size is proportional to the Degree value, and the node color is proportional to the Betweenness value.

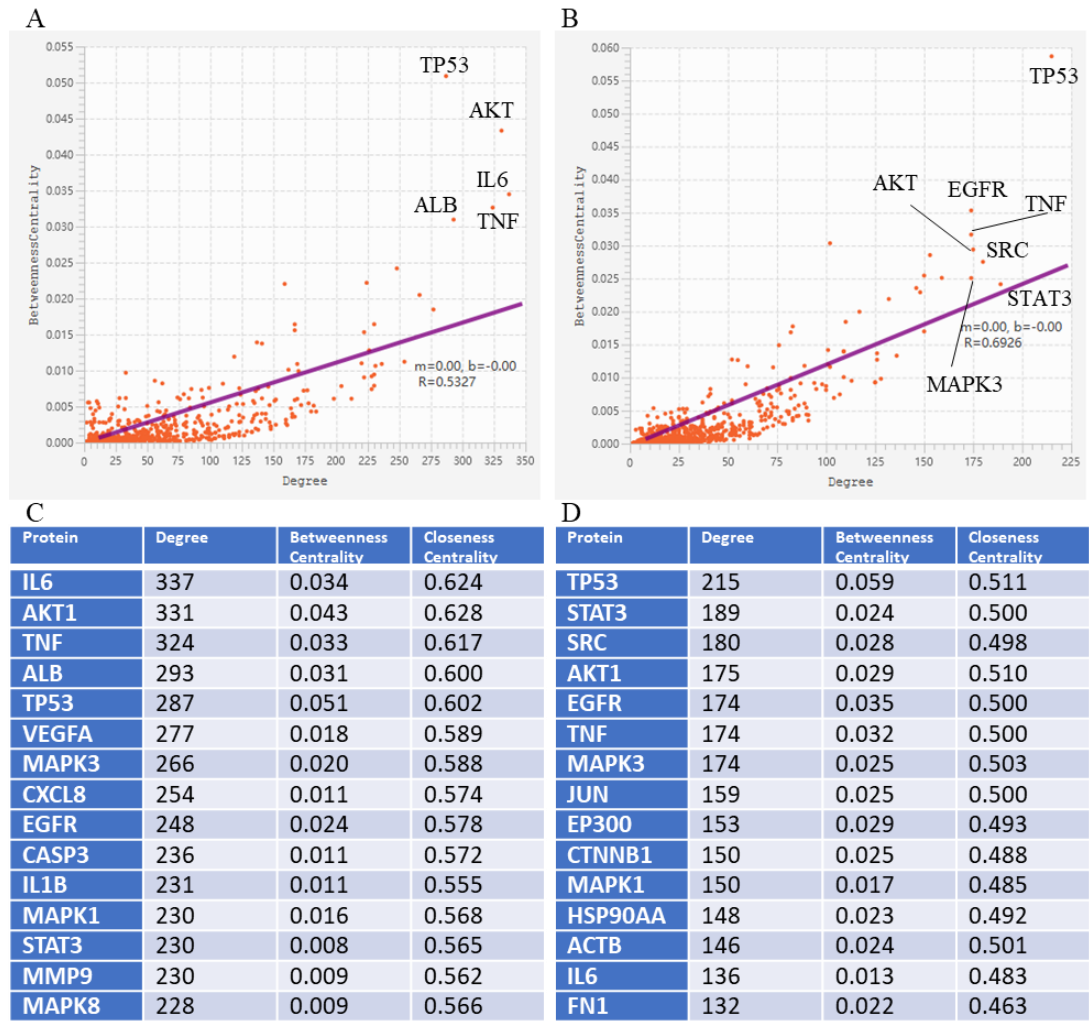

**Figure. S2** Analysis of COPD and osteoporosis disease-specific PPI network. (A) Relationship between Degree and Betweenness of nodes in COPD disease-specific PPI network; (B) Relationship between Degree and Betweenness of nodes in osteoporosis disease-specific PPI network; (C) Top 15 protein targets in COPD disease-specific PPI network and (D) The top 15 protein targets in osteoporosis disease-specific PPI network according to the value of the degree.

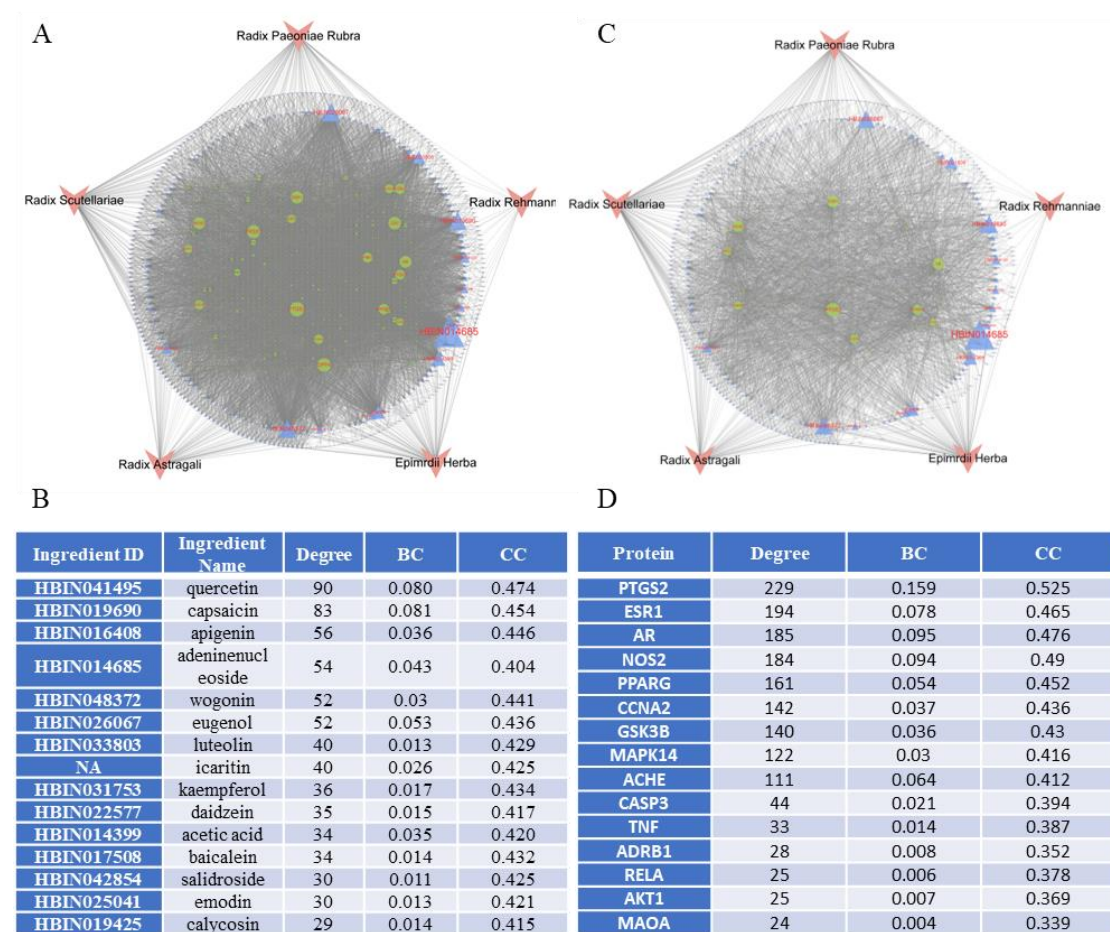

**Figure. S3** The Herb-Ingredient-Target (H-I-T) network and the Herb-Potential Ingredient-Potential Target (HB-PI-PT) network. The V shapes, triangles, and circles represent the herbs, ingredients, and targets, respectively. The core ingredients, targets, potential ingredients, and targets for COPD-related OP therapy, were marked. The H-I-T network (A) and the relationship between degree and betweenness centrality (B) in this network. The HB-PI-PT network (C) and the relationship between degree and betweenness centrality (D) in this network.

Table S1 The composition of MBSYQ formulae

| Botanical plant name              | Chinese name | Part used   | Dosage (g) | Place of origin   | Test report number |
|-----------------------------------|--------------|-------------|------------|-------------------|--------------------|
| Astragalus mongholicus Bunge      | Huang Qi     | Root        | 30         | Gansu, China      | No.78456           |
| Epimedium brevicornu Maxim.       | Yin Yang Huo | Aerial part | 20         | Gansu, China      | No.81428           |
| Rehmannia glutinosa (Gaertn.) DC. | Di Huang     | Root tuber  | 15         | Henan, China      | No.79639           |
| Scutellaria baicalensis Georgi    | Huang Qin    | Root        | 30         | Shandong, China   | No.75369           |
| Paeonia lactiflora Pall.          | Chi Shao     | Root        | 30         | Nei Mongol, China | No.77927           |

Table S2 Primer sequences used for quantitative RT-PCR

| Gene   | Forward primer (5' to 3') | Reverse primer (5' to 3') |
|--------|---------------------------|---------------------------|
| Actb   | CCTCTATGCCAACACAGT        | AGCCACCAATCCACACAG        |
| Gpx1   | ATAGAAGCCCTGCTGTCCAAG     | ATCACCAAGCCCAGATACCA      |
| Gpx4   | TCTGTGTAAATGGGGACGATG     | CGCAGCCGTTCTTATCAATG      |
| Uqcrb  | CCCCAGGTTAGTTACCCAG       | AAGCCCATAATGGAATACAGAC    |
| Ndufa4 | AAACATCCCAGCTTGATCC       | ATACAGTGCTGCTCCAGTACC     |

Table S3. Proteins related to COPD and OP based on TTD, CTD and DisGeNET database

| Osteoporosis |        |         |         |         |         | Chronic obstructive pulmonary disease |        |          |          |
|--------------|--------|---------|---------|---------|---------|---------------------------------------|--------|----------|----------|
| BGLAP        | BIRC5  | LUM     | ABCC3   | KISS1   | PRPF6   | MMP1                                  | TAFA2  | BAX      | DMBT1    |
| TNFSF11      | ALDOA  | PTPN11  | KLRK1   | MYBBP1A | AREG    | HMOX1                                 | OR6F1  | CASP9    | ELOVL3   |
| TNF          | IGFBP5 | MTOR    | SELENOP | RHOQ    | CYP27B1 | SFTPD                                 | IFNG   | PER2     | OIP5     |
| BCL2         | ME1    | NCOA1   | AGTR1A  | NR1I3   | FBLN5   | HDAC2                                 | BMP8A  | SOD1     | TNFSF4   |
| RUNX2        | IL18   | CSF2    | ARPP19  | COL12A1 | FBXO32  | MMP9                                  | IL1A   | ITGB2    | FOSL1    |
| CASP3        | PDGFA  | APOB    | CDC42   | ECI1    | GAP43   | TGFB1                                 | IL1B   | NDC80    | GADD45A  |
| TNFRSF11B    | IL12A  | MT2A    | IL23A   | NDUFS1  | HADH    | FAM13A                                | IL5    | ATF3     | CRISPLD2 |
| TGFB1        | PIK3R1 | IGF1R   | ITGA1   | PTCH1   | IL1RL1  | SERPINA1                              | IL10   | SMAD2    | SQSTM1   |
| BAX          | PTH    | SDC1    | AREG    | GSN     | ITGA3   | DSP                                   | IL13   | STAT1    | ADRA1D   |
| NFE2L2       | CDK4   | ABCG1   | F2R     | PDIA3   | MSR1    | ELN                                   | IL18   | MT1      | ATP2A2   |
| IL6          | RAC1   | IDO1    | PDGFRA  | AMIGO2  | NCAPG   | EPHX1                                 | CXCL10 | CCL4     | FOLR1    |
| NOS2         | GFAP   | HNF4A   | CDH2    | CAMKK2  | PHB     | MTCL1                                 | ITGA1  | HSP90AA1 | DLL1     |
| PPARGC1A     | GAS6   | HSD11B1 | ENO1    | UTRN    | RFC3    | IL6                                   | ITGB8  | SERPINB2 | KIF23    |
| PPARG        | IRAK1  | PCSK9   | BASP1   | AGTR1   | MMP16   | CXCL8                                 | ITPK1  | TNFSF10  | PTPRG    |
| ALPL         | CTSK   | CFLAR   | DRD2    | BMF     | PLPP2   | EEFSEC                                | EFCAB5 | RELB     | GPX4     |
| HMOX1        | ATP2A2 | SLC3A2  | RAP1A   | MXD1    | MMP2    | TNF                                   | KCNMA1 | IL3      | IL9      |



|        |          |         |         |         |         |          |           |          |          |
|--------|----------|---------|---------|---------|---------|----------|-----------|----------|----------|
| CASP9  | NTRK2    | BIRC3   | F11     | SHC1    | ANXA4   | NOS3     | TNPO1     | TH       | ITGA5    |
| VEGFA  | ECH1     | CCN3    | DRD1    | SHH     | AVP     | CYP1A1   | MIR99AHG  | INS1     | PRKCA    |
| TP53   | LCN2     | THRA    | MCM2    | NFIL3   | LPAR1   | SOD3     | LINC01118 | FOXP3    | PRDX2    |
| CDKN1A | HSD3B1   | ACSS2   | BDKRB2  | RBBP8   | RYR1    | FOXO3    | CASC15    | RB1      | CXCL14   |
| PTGS2  | CXCL1    | ATF3    | CXCL14  | NR0B2   | MUC1    | NOS2     | LPO       | ADM      | MB       |
| CTNNA1 | LDLR     | EZR     | SLC1A3  | VDAC1   | CEBPD   | CXCL1    | ARVCF     | COL1A1   | PLCG1    |
| MMP9   | EIF4EBP1 | GH1     | ATG12   | UBC     | CD74    | CYP1A2   | MFAP2     | IL2RA    | IGF1R    |
| RELA   | MGP      | ITGA2   | DNMT3A  | WT1     | PLD1    | HTR2A    | MMP12     | AR       | NRF1     |
| IL1B   | RPS6KB1  | HMGCR   | SESN1   | YWHAZ   | APOC1   | TRPV4    | SUZ12P1   | BIRC3    | IL1R1    |
| MMP2   | ADM      | STAT4   | CHEK1   | AMD1    | HDAC2   | RAPGEF3  | LINC02869 | IGFBP3   | ZNF845   |
| FOS    | CYP11A1  | JUNB    | CCL7    | IFI6    | IFITM3  | TP53     | IRF1-AS1  | SLCO1B1  | MCF2L    |
| MAPK1  | IGF2     | BNIP3   | BACE1   | ILF3    | LGMN    | CXCL2    | PLF       | CYCS     | TSC22D3  |
| FN1    | MSMO1    | MYH7    | BTG2    | UGT1A1  | NPHS1   | MMP14    | MYH7      | BMP2     | SLC22A2  |
| JUN    | APOE     | DUSP4   | NR5A1   | KCNJ16  | SYK     | KLF5     | NCF2      | PBK      | CCNE2    |
| IGF1   | ASNS     | SCD2    | PIIF    | DIO3    | ARNTL   | TNNT2    | NCF4      | NGF      | PDGFB    |
| FAS    | G6PD     | CCNB2   | TRAF2   | TLR3    | HSPA2   | CD8A     | RERE      | CLU      | CX3CR1   |
| CD14   | SMAD3    | CYP3A11 | ACO2    | APAF1   | SOX2    | IL17A    | DELEC1    | SLC22A3  | JUNB     |
| CAT    | RB1      | PLEC    | TCF4    | GCH1    | UHRF1   | MIR218-2 | PCDH9     | UCP1     | TGFBR2   |
| NQO1   | CDH1     | CYP19A1 | HSD11B2 | CSF2RB  | IDH2    | MUC5AC   | PCM1      | MYL2     | PFKFB3   |
| CXCL8  | RHOA     | ENC1    | KRT19   | OXTR    | BCR     | NFE2L2   | PLCE1     | ABCB1    | PTK2     |
| CXCL12 | FST      | F13A1   | AHSG    | ALCAM   | BST2    | TIMP1    | RSRC1     | AHR      | RAD51    |
| MAPK3  | PLA2G2A  | PTHLH   | PTH1R   | CCNA1   | HNRNPD  | VEGFA    | PDE4A     | TNFRSF1B | CCNA2    |
| BMP2   | DDX21    | DLC1    | CAMK2A  | EFEMP1  | PEX11A  | EGFR     | HDAC7     | MYD88    | CYP17A1  |
| NFKB1  | KIT      | PPP3CA  | PROS1   | SFRP1   | PIGR    | CASP3    | SERPINE2  | CD40LG   | PLEC     |
| SOD2   | IGFBP4   | PSAT1   | METTL7A | SULT1A1 | TICAM1  | SERPINE1 | PIK3CA    | TGFB1    | MIR1224  |
| SPP1   | TF       | SP1     | H2BC5   | CSF1    | PBK     | MUC1     | PIK3CD    | NR1D1    | PPARA    |
| VCAM1  | CASP7    | F3      | MMP10   | SYNJ2   | CD14    | PLAU     | PITPNA    | ABCA1    | CD33     |
| NFKBIA | BMP4     | GPD1    | SLC26A2 | TNIP1   | TGFB2   | SLPI     | BTBD1     | STAT3    | SLC6A14  |
| GSK3B  | NRF1     | LAMP1   | ESR1    | ETS2    | GLI1    | CCN2     | RAB4B     | CIRBP    | CDC25B   |
| CCND1  | POU5F1   | MAP2K2  | HPCA    | IFNB1   | NCAM1   | MPO      | SNTG2     | SPC25    | KRT1     |
| CCL2   | GSTM3    | GPAM    | ADA     | MVK     | LDHA    | STAT4    | GDAP1     | TGM1     | MT2      |
| AKT1   | EIF2S1   | CYP24A1 | CST3    | NOS3    | DNER    | DDIT3    | PPARG     | THBD     | MAP1LC3B |
| IL4    | PRKCE    | LY6E    | DUSP2   | GAPDH   | ECI2    | SMAD4    | FEV       | CCR2     | ATG12    |
| CYP3A4 | GRB2     | CRH     | PRKACA  | FGFR1   | HSPA12A | BNIP3    | TET2      | GSN      | FABP1    |
| CYCS   | NGF      | CYP7A1  | RPL6    | IRF1    | CYP7B1  | CASP12   | BNC2      | CTNNA1   | CPT1B    |
| IL10   | NOX4     | JAK2    | TGFB2   | CYP4B1  | FKBP1A  | CFTR     | BCAS3     | COL4A1   | IL11     |
| PARP1  | BCL3     | PHGDH   | ASIC1   | SDHA    | HADHB   | CHRNA3   | CASZ1     | CKM      | GSK3B    |
| COL1A1 | NR1H3    | TLR2    | GDF15   | PTGIS   | PTPRC   | CHRNA5   | MKS1      | IL7R     | PDGFRB   |
| IFNG   | TK1      | ALAS1   | XIAP    | SCARB1  | SLC9A1  | NQO1     | RNF220    | MCM6     | CSF3     |
| EDN1   | BECN1    | MMP13   | XRCC1   | SCD     | GPER1   | AGER     | CCDC91    | SOCS3    | E2F7     |
| GSR    | PDK4     | TGFB1   | ACLY    | VSNL1   | PGR     | ERBB3    | SLC30A10  | AGR2     | FOXO1    |
| FASN   | VDR      | GADD45A | AURKA   | ANXA3   | FGFR3   | FAIM2    | FGD6      | MMP13    | FBXO32   |
| INS1   | FSHB     | FTH1    | CTSL    | CDK2AP2 | GHR     | FAS      | PRKCB     | AQP1     | IFT1     |
| CASP8  | POMC     | NPPA    | TPM3    | SULT2A1 | KLF5    | FASLG    | PKN2      | CCL19    | LITAF    |

|        |          |          |          |          |         |           |           |         |         |
|--------|----------|----------|----------|----------|---------|-----------|-----------|---------|---------|
| MKI67  | SOX9     | WNT5A    | WNT5A    | SOCS3    | MYOG    | IREB2     | CCL28     | ENO1    | RHOA    |
| AGT    | CAMK2D   | BBC3     | LILRB3   | DUSP10   | RRP12   | PLAUR     | C1GALT1   | MIR125A | CDC45   |
| ICAM1  | CALCA    | BCL2A1   | SPP1     | TMPO     | ATP2B1  | SMPD3     | PDSS2     | ANGPTL4 | CORO1A  |
| SOD1   | CCNE1    | COX2     | ADAMTS4  | DNAJB1   | COL4A2  | CASP8     | ADAMTSL3  | AQP3    | FCER1G  |
| CDKN1B | SMAD2    | ITGB2    | ACAA2    | MAPK14   | TJP2    | CHRN4     | ADGRG6    | TNC     | SLC7A7  |
| APP    | ECE1     | UPP1     | COL18A1  | ARNT2    | TWIST1  | CTLA4     | PTGS2     | IKBKB   | ABCG2   |
| BCL2L1 | TNFRSF1A | MGP      | EIF4E    | DLK1     | SOCS2   | MMP3      | MICAL3    | S100A4  | AKR1B10 |
| ESR1   | TXNIP    | PPP1R15A | SDC4     | JAK3     | CD40    | HSPA4     | TSHZ3     | OLR1    | APCS    |
| IL12B  | SERPINE2 | MIF      | ATAD2    | MX1      | KRT8    | CHRM3     | RARB      | MMP8    | MFN1    |
| NR3C1  | RGS2     | ATP5F1A  | TP53NP1  | PTGDS    | ACADVL  | SCGB1A1   | RNPEP     | PPBP    | APP     |
| LPL    | CTSB     | DNMT1    | CFB      | COPB2    | ATP1A2  | PLB1      | RREB1     | CD68    | CD40    |
| VWF    | IRS1     | ABCA1    | MMP12    | SOX13    | FOXA2   | PRTN3     | CCL2      | ACTB    | MIR185  |
| PCNA   | ODC1     | HMGCS2   | MVD      | TNK2     | IFI27   | THSD4     | SFTPB     | MT3     | KIF20A  |
| S100A9 | PRKCD    | SPHK1    | STIP1    | RHOB     | PAICS   | CYBA      | HHIP      | THY1    | PER1    |
| ALB    | CYP24A1  | ANGPTL4  | SLC6A1   | TXNRD1   | ULK1    | HSPA1A    | SGCD      | GSTA4   | GPRC5A  |
| NOS3   | CASP1    | ALDH3A2  | CASP4    | HPCAL1   | XRCC5   | HTR4      | LINC00598 | PLA2G7  | EFNA1   |
| MPO    | BIRC2    | GRN      | HES1     | ACSL4    | MCTP1   | NFKB1     | PCDH15    | CXCL16  | ANXA4   |
| CXCL2  | SP7      | XBP1     | IFT1     | COL5A2   | SGK3    | RNF150    | NCF1      | OAS1    | BCHE    |
| COL3A1 | PRL      | NOS1     | LITAF    | COL6A1   | TGM2    | TNS1      | BTC       | CAR3    | CYP3A5  |
| CTSD   | SLCO2B1  | ADGRG1   | CCND2    | MAP3K1   | ABCC4   | CDH13     | TBX1      | ITGAM   | ACTA1   |
| ESR2   | CCN5     | HSF1     | KL       | TGFA     | DNAJA1  | HYKK      | TGFB2     | LMNA    | PKM     |
| CPT1A  | CASP12   | F2       | ATP2B4   | HAMP     | IDH1    | CYBB      | THRA      | MIR342  | HMOX2   |
| SREBF1 | SRC      | IL1RN    | FSTL1    | C1QB     | NEFH    | DNAAF4    | TLR2      | SMAD3   | PARP1   |
| IGFBP3 | CCNA2    | EGF      | OLFML3   | INHBB    | BRCA1   | PSORS1C1  | TLR4      | CREB1   | CD177   |
| RARA   | HPGD     | FHL2     | GADD45G  | ITGAV    | CEACAM6 | DLG2      | TOP2B     | SAA3    | CTSK    |
| SLC2A2 | TGFBR2   | MMP3     | GSTA1    | MAF      | AGTR2   | DNAH5     | PPIEL     | CXCL3   | HSPA6   |
| GPT    | CLGN     | CSF1R    | HAVCR1   | COL10A1  | G6PC    | DOCK1     | AMD1P3    | EREG    | CCL22   |
| STAT3  | CYP17A1  | ADAM17   | RUNX2    | EHHADH   | OPA1    | PDZD2     | HIRA      | MAP3K14 | FDXR    |
| STAT1  | MAP2K6   | INSIG1   | ACAN     | TSC22D1  | JAG1    | NPNT      | DIRC3     | CASP2   | ODC1    |
| CCN2   | TGFBR1   | CFL1     | ARHGDI4  | EDN2     | TGFB1   | HLA-DPA1  | LINC00886 | RAC1    | SRC     |
| PLAT   | CYBA     | COL5A1   | NREP     | OLFM1    | FABP1   | HLA-DPB1  | UFD1      | KRT15   | LIPC    |
| TLR4   | NUPR1    | TGFA     | SERPINA1 | NDUFA4L2 | CPN1    | HSPA1B    | WAS       | CCND1   | GPX3    |
| ADIPOQ | SLC2A1   | SLC27A2  | PMAIP1   | TNC      | STIM1   | HSPA1L    | ZKSCAN1   | LEP     | PDK4    |
| MAOA   | ADORA2A  | STC2     | ARNT     | ANTXR1   | NIBAN1  | INPP5D    | SLMAP     | PLA2G4A | COX2    |
| GCLC   | HMGB1    | PRDX2    | INSR     | APOM     | SLC7A2  | KCNK1     | CYBC1     | COL3A1  | GIN52   |
| THBS1  | CAV1     | RHBDF1   | NOLC1    | HOPX     | TFAP2A  | ARHGEF38  | SPAG16    | MAD2L1  | ISYNA1  |
| IL2    | CYP1B1   | PAK2     | PTPN1    | SERPIN5  | CCL11   | INTS12    | SYNP02L   | CDKN1A  | CCNB2   |
| PGR    | HSPB1    | CALR     | KEAP1    | NDC80    | ORM1    | CSMD1     | DENND2D   | GSR     | NOTCH3  |
| BAD    | PDGFRB   | RBP1     | CYP3A4   | PDE5A    | CHEK2   | WIPF1     | STN1      | GNB1    | CXCL6   |
| MAPK8  | FGF2     | LTBP1    | CPT1B    | PTPRR    | ASS1    | FTO       | TMEM254   | SLC22A1 | MYL4    |
| ITPR1  | GGT1     | TRADD    | FLT1     | SGK1     | GLRX    | GSTCD     | PPP1R2C   | TGFA    | TXN     |
| DKK1   | MAPT     | NR1H4    | ACTG2    | TGFBR2   | ADH1A   | GAB2      | CEP70     | NR4A1   | APOLD1  |
| VDR    | SOD3     | PON1     | FGF9     | CLDN11   | COX6C   | ZDHHC20P2 | ADAM33    | AGT     | DNAJA1  |
| MAP2K1 | HSP90B1  | ATF6     | HYOU1    | LAMB2    | SMPD3   | MAPT-AS1  | HMGA2     | CDKN1B  | CTTN    |

|         |           |          |           |           |        |             |          |         |         |
|---------|-----------|----------|-----------|-----------|--------|-------------|----------|---------|---------|
| PRKAA1  | MYH6      | FDFT1    | IRAK2     | MKNK2     | SMAD7  | WTAPP1      | RSPH6A   | TPM3    | VDR     |
| CRP     | SELP      | CFTR     | P4HA1     | NPY1R     | BCL6   | LINC01006   | TSPAN14  | RGS2    | APOE    |
| ERN1    | COL4A1    | GPM6B    | SLC27A1   | UQCRC2    | CITED2 | CHRM3-AS2   | SYN3     | FKBP5   | MAP2K6  |
| GPX1    | FOXO1     | ACE      | SLC4A4    | BMP7      | HTR1A  | MIA-RAB4B   | LRMDA    | G6PD    | PFKP    |
| ABCG2   | PTGES     | BCL2L11  | SLC10A1   | NFATC1    | LPIN1  | RAB4B-EGLN2 | ADGRV1   | CYP1B1  | INIP    |
| CDH2    | TNFRSF10B | NANOG    | GATA4     | ARG1      | PLPP1  | NNT-AS1     | ARMC2    | HSPB1   | GADD45B |
| TH      | RASGRP1   | AKT2     | CSRP2     | FGFR2     | PLOD2  | COX10-AS1   | ZDHHC18  | LEF1    | MYH10   |
| CEBPA   | MYL2      | DCN      | HMCN1     | GSTA2     | CRYAB  | CDH11       | ABLM2    | SPHK1   | NCAPG   |
| SCD1    | FOXO3     | FGR      | CRP       | OXT       | NT5E   | LINC01807   | CAT      | CFB     | BCL2L1  |
| DDIT3   | SULF2     | TPD52L1  | PGF       | NPTN      | ISG20  | LINC01876   | TOX2     | ASPM    | GSTA2   |
| SELE    | HMGCS1    | IL13     | TRIB3     | GART      | SPTAN1 | CD96        | ADAM19   | OGG1    | TMC5    |
| SPARC   | GPX3      | NUCB2    | CDKN2C    | TGFBR3    | GSK3A  | LINC02863   | CDC123   | GAS1    | BAD     |
| TRP53   | PXN       | SDC2     | CTSC      | CLDN1     | SC5D   | TESK2       | HERC1    | NLRP3   | DSC2    |
| TNFSF10 | CKB       | HSPA1A   | DGAT2     | GRIN1     |        | CFDP1       | PKD2L1   | STAR    | P4HA1   |
| SQSTM1  | MMP14     | UCP1     | NGFR      | NCF2      |        | RNASEH2A    | IL33     | BECN1   | TFAM    |
| CCL5    | ZEB1      | SLP1     | COL1A2    | SLC6A9    |        | LINC01937   | PLXNA4   | HSPA8   | TTR     |
| HSPA5   | ACHE      | TIMP3    | SRXN1     | UBE2I     |        | LINC01997   | WDR20    | ANXA2   | ARG2    |
| C3      | HRAS      | RXRA     | CALCR     | SERPINA5  |        | LINC02625   | MFHAS1   | NUSAP1  | ASS1    |
| MMP1    | PRNP      | NCL      | KNG1      | CAPN2     |        | MIR4527HG   | KCNG4    | HSPD1   | S100A6  |
| CD36    | GLUL      | HSP90AA1 | DNMT3B    | ITGA5     |        | HSF2BP      | ADIPOQ   | CD83    | HGF     |
| CCL3    | HSPD1     | CYP27B1  | IL33      | SCNN1A    |        | ADCY5       | CDRT15P1 | KRT8    | RETNLA  |
| CEBPB   | CDK6      | IL17A    | RET       | VCAN      |        | SGF29       | CDYL     | S100A8  | XDH     |
| CYP2E1  | DUSP5     | SLC6A3   | CD40LG    | JUND      |        | BTBD9       | TBX4     | ABCC1   | SMC4    |
| FASLG   | PLAU      | STMN1    | CP        | AKAP9     |        | KLHL32      | SEC24C   | DNAJB4  | PDE4B   |
| ID3     | PTX3      | F8       | CLIC4     | ARPC1B    |        | GALNT13     | VGLL4    | TXNRD1  | PTPRC   |
| BID     | SFRP2     | MAP2     | EIF5A     | COL8A1    |        | BTBD11      | TM9SF4   | IHH     | GSTA1   |
| BDNF    | AHR       | UCP2     | FLNB      | GSTA4     |        | TMEM219     | ATP2C2   | THBS1   | TYMS    |
| VIM     | NPPB      | BGLAP    | CCNG1     | PCSK5     |        | UBR3        | EDN1     | CALML3  | CDKN3   |
| CCNB1   | PLPP3     | CD44     | NRG1      | PDLIM7    |        | COMT        | CSF2     | SPON2   | ISG15   |
| S100A8  | PLSCR1    | S100A6   | FGF8      | FGF1      |        | SCLT1       | IL4      | ITGB1   | MGMT    |
| SLC2A4  | ABCC2     | REN      | TRIM16    | HOXA5     |        | CRP         | CCL5     | CDKN2B  | C5AR2   |
| FABP4   | SERPINB2  | PSMC3    | CTH       | ABCB1B    |        | NOL4L       | ICAM1    | IL32    | NRN1    |
| EGR1    | FDP5      | TNFRSF21 | LOX       | RASD1     |        | MAPK14      | CD44     | KRT18   | CD24    |
| NR1H2   | INHBA     | PRKCB    | ATP1A1    | SLC7A5    |        | CSE1L       | SOD2     | XBP1    | GGT1    |
| ACP5    | ACKR3     | EPB41L1  | TNFRSF10A | TNFRSF12A |        | ARHGAP42    | CCL3     | PRDX6   | AIF1    |
| AR      | BGN       | LTBR     | ALDOC     | GPRC5A    |        | LYSMD4      | NR3C1    | TFRC    | KCND3   |
| XDH     | SIRT3     | PTEN     | FADD      | GSTT1     |        | SLC35F3     | ADRB1    | FGF23   | MTA1    |
| TJP1    | CCN1      | CXCL5    | GREB1     | LRP1      |        | CNTN4       | FOS      | GSTM3   | CTSL    |
| TIMP1   | GCLM      | ISG15    | HSD17B4   | SPTBN1    |        | SCFD2       | NFKBIA   | CSF3R   | CTSB    |
| PRKCA   | GRB10     | ELK1     | MAOB      | GZMB      |        | ADRB2       | RELA     | EIF2AK3 | CTSS    |
| DNAJB9  | CASP2     | IGFBP1   | SLCO1A1   | PFKFB4    |        | AMZ1        | MAPK1    | H19     | CTSF    |
| GOT1    | KLF4      | IL15     | TACC1     | SERPINA3  |        | SPPL2C      | VCAM1    | ABCC2   | PAR2    |
| CDK2    | CASP6     | MUC1     | ATP1B1    | SNAI1     |        | ACE         | SLC5A1   | SLC22A4 | PDE4    |
| RRM2    | ROCK1     | IRS2     | CDKN2B    | TOP2B     |        | GLIS3       | IL2      | TRADD   | MADCAM1 |

|          |           |          |           |          |            |          |         |                 |
|----------|-----------|----------|-----------|----------|------------|----------|---------|-----------------|
| COL1A2   | STAR      | TFAM     | ADIPOR2   | ADH1B    | DMWD       | CCL11    | CENPF   | CXCR2           |
| RPS6     | CTSS      | TGFB3    | APOD      | DES      | DPP6       | FN1      | NFIL3   | CXCR1           |
| ABCB1    | ACOX1     | E2F1     | CPE       | IL1B     | CYS1       | VIM      | FTH1    | CCR5            |
| MYC      | INS       | MYD88    | DCLK1     | SLC2A3   | FAM227B    | BCL2     | ADRB3   | CCR5 mRNA       |
| PPARA    | ABCC5     | MAP2K3   | HDAC9     | ASPH     | ELANE      | HSPA5    | CXCL11  | CHRM            |
| HGF      | ALDH1A3   | HSP90AB1 | TNFSF14   | BHMT     | CFAP221    | NPPA     | IGF1    | NE              |
| HIF1A    | SLC20A1   | PIM1     | JAK1      | CAMK4    | ALB        | KRAS     | ANKRD1  | p38 alpha       |
| LHB      | TFF1      | PLA1A    | SELENBP1  | ETS1     | JMJD1C     | MAPK8    | GDF15   | Telomerase mRNA |
| EEF1A1   | ITPR3     | AOX1     | LAMB3     | HSPA4    | SYCP2L     | MAPK3    | CCR7    | CHRM1           |
| MAPK9    | ACACA     | CSRP3    | GPX2      | PRMT1    | ATXN7L1    | MMP2     | MMP11   | MARCKS          |
| PLA2G4A  | GJA1      | ENO2     | CACNA1E   | RELA     | FGL1       | FGF2     | ARG1    | Bact metB       |
| SIRT1    | NFKB2     | RACGAP1  | SFTPB     | SLCO4A1  | FBXL7      | PON1     | CCN1    | ADAM17          |
| BAK1     | SNCA      | CLU      | TNFRSF11A | ALAD     | ASTN2      | PPARGC1A | FGF7    | CHRM5           |
| ATP1A1   | ACTB      | MET      | UBB       | LIF      | USP24      | SPP1     | NPR3    | CACNA2D1        |
| PTGS1    | NPM1      | CD86     | NCOA1     | ELF3     | SIRT1      | GPX2     | PTH     | ATP1A1          |
| ACTA2    | TNFAIP6   | ANXA1    | APOA1     | GDA      | ZFPM2      | SELP     | GCLC    | ADOR            |
| IKBKB    | EFNA1     | KYNU     | HNRNPH1   | GREB1    | POFUT1     | ATF2     | FST     | PRO             |
| TFRC     | ALPP      | PTH      | HSPA9     | LAMC1    | NNT        | F3       | SRXN1   | PDE4D           |
| CXCR4    | MAPK10    | EPHX2    | PLIN2     | PSAP     | ZBTB38     | MIRLET7E | ITGB4   | KC              |
| ITGAM    | RAF1      | UBE2D2   | IRF7      | SRM      | MMS22L     | CDKN2A   | CCL1    | 5-LOX           |
| CYP1A1   | H2AX      | DUSP6    | CHAT      | TSLP     | NIFK-AS1   | NPPB     | CSF1    | CCR1            |
| IL1A     | NFE2L1    | IGFBP2   | ELOVL5    | IER3     | GABPA      | ANXA3    | CALCA   | TACR2           |
| HDAC1    | TIMP2     | NCOA2    | OGDH      | PLCB1    | COPD       | AREG     | CLCA1   | TACR1           |
| LEP      | CHUK      | HNRNPAB  | TCP1      | OLFML2A  | CCDC69     | SELE     | SGK1    | TACR3           |
| CXCL10   | PDGFB     | NCF1     | TNFSF9    | PTPRU    | PTPN22     | ACTA2    | IRS1    | PDE3            |
| ATF2     | SERPINE1  | ACSL3    | ESR2      | ANGPT2   | GC         | CD14     | FOSB    | MMP-12          |
| ABCC1    | KRT5      | PPP1R1B  | ACADL     | BSG      | GLA        | PRDX1    | CDKN1C  | D2R             |
| CDK1     | TNFRSF1B  | GPER1    | ACSL1     | C4B      | RBMS3      | VWF      | AGTR1   | ROCK2           |
| RGS4     | HSPB8     | THY1     | ITGB1     | NPC2     | HPGDS      | IL1RN    | LTF     | ROCK1           |
| CREB1    | IL6       | TOP1     | GDF10     | ACOT1    | TNRC6A     | PECAM1   | CD4     | TNF-R1          |
| TOP2A    | TNFRSF11B | TNFAIP3  | PRLR      | MFN2     | EML4       | IL1R2    | CXCR4   | EPHX2           |
| KDR      | TNFSF11   | ACACB    | TRPV6     | SLC38A2  | GM2A       | JUN      | LBP     | CO5             |
| GSTP1    | ALOX5     | P2RX7    | ARRB2     | SLC22A8  | GP1BB      | DUSP1    | LCAT    | VIPR2           |
| TRAF6    | DUSP1     | ALDH1A1  | MDM2      | TDO2     | CRACR2B    | CYP3A4   | EGR2    | ATIII           |
| OCLN     | MCL1      | ACADM    | NEFM      | CD55     | HNFI1A-AS1 | CASP6    | LIFR    | p38             |
| CYP1A2   | POSTN     | EIF2AK3  | PPIA      | CFD      | LAMA1      | MAPK9    | S100P   | P2RX7           |
| SERPINH1 | CCL20     | IFIT3    | ADRB1     | ATM      | NWD1       | EGR1     | CAV1    | CIC             |
| IL5      | PTK2      | AQP3     | ARG2      | HOXB9    | C1orf185   | AKT1     | TIMP2   | PCSK9           |
| CYP2C9   | ANXA2     | EP300    | CDKN3     | NPHS2    | GRIK4      | BDNF     | NEDD4L  | CELA1           |
| EGFR     | SQLE      | PDK1     | AGR2      | PLD3     | GSTM1      | IL1RL1   | MYC     | IL5RA           |
| PECAM1   | CES3      | SLC40A1  | TNF       | AFP      | GSTP1      | IL12B    | ITGA2   | PTGDR2          |
| SERPINE1 | LBP       | CH13L1   | HSPA1B    | TNFRSF25 | GSTT1      | CCL20    | CCL7    | CYM             |
| PER2     | DIO2      | EPOR     | CTSH      | CDC20    | GTF2I      | CD86     | CTNNAL1 | CTSG            |
| MMP7     | SELL      | PDHA1    | MYLK      | MGST1    | HOOK2      | S100A9   | ATM     | ADORA2A         |

|        |         |         |       |         |        |         |        |          |
|--------|---------|---------|-------|---------|--------|---------|--------|----------|
| CAPN1  | SLC19A1 | ATF4    | RIPK1 | UNG     | CFH    | ACHE    | CYYR1  | ESR1     |
| COL2A1 | SLC22A5 | CD38    | GLS   | PAX8    | ANXA5  | ANXA1   | MAOA   | CASP7    |
| CYBB   | NOS2A   | CLSTN1  | LTF   | WWC1    | NRG1   | OCLN    | AURKA  | DEPDC1B  |
| ID1    | DDIT4   | RERG    | MAP1B | SLC37A4 | HIF1A  | TNFAIP3 | LIF    | HSBP1    |
| RELB   | CBR1    | SLC16A1 | REL   | GDNF    | HLA-B  | CXCL5   | GCLM   | TNFRSF1A |
| PCK1   | DBN1    | GSTM1   | TGIF1 | HRH1    | ANXA11 | PLAT    | PHLDA1 | ALDOA    |
| MAPK14 | SLC7A11 | S100A4  | CRIM1 | KIF20A  |        |         |        |          |
